# Supplementary material
Source: PubMed Central journal article supplement (PMC10188274)
Supplement: mmc1.pdf [file mmc1.pdf]

**Supplemental information**

**Complement-dependent mpox-virus-neutralizing  
antibodies in infected and vaccinated individuals**

**Mathieu Hubert, Florence Guivel-Benhassine, Timothée Bruel, Françoise Porrot, Delphine Planas, Jessica Vanhomwegen, Aurélie Wiedemann, Sonia Burrel, Stéphane Marot, Romain Palich, Gentiane Monsel, Harouna Diombera, Sébastien Gallien, Jose Luis Lopez-Zaragoza, William Vindrios, Fabien Taieb, Sandrine Fernandes-Pellerin, Maurine Delhayé, Hélène Laude, Laurence Arowas, Marie-Noelle Ungeheuer, Laurent Hocqueloux, Valérie Pourcher, Thierry Prazuck, Anne-Geneviève Marcelin, Jean-Daniel Lelièvre, Christophe Batéjat, Yves Lévy, Jean-Claude Manuguerra, and Olivier Schwartz**

**A**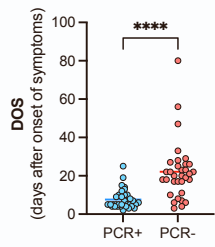**B**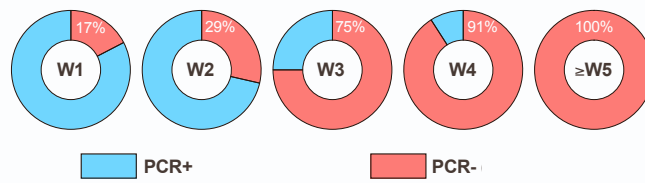**C**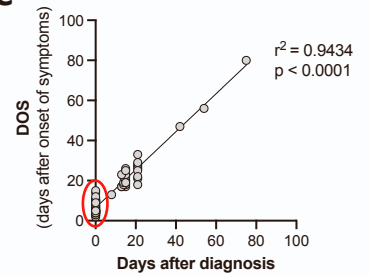

**Extended Data Fig. 1. Association between time after onset of symptoms, day of mpx diagnosis and detection of the MPXV genome, related to Figure 4**

- (A) Detection of MPXV genome by PCR in the plasma of MPXV-infected patients at the indicated days after onset of symptoms (DOS) (n=66).
- (B) Detection of MPXV in the plasma of infected patients at the indicated weeks after onset of symptoms. The percentage of positive individuals is indicated.
- (C) Correlation between time after onset of symptoms and time after mpx diagnosis. The red oval shows the lag between symptoms and diagnosis. The correlation was analyzed by a simple linear regression that significantly links the two parameters.

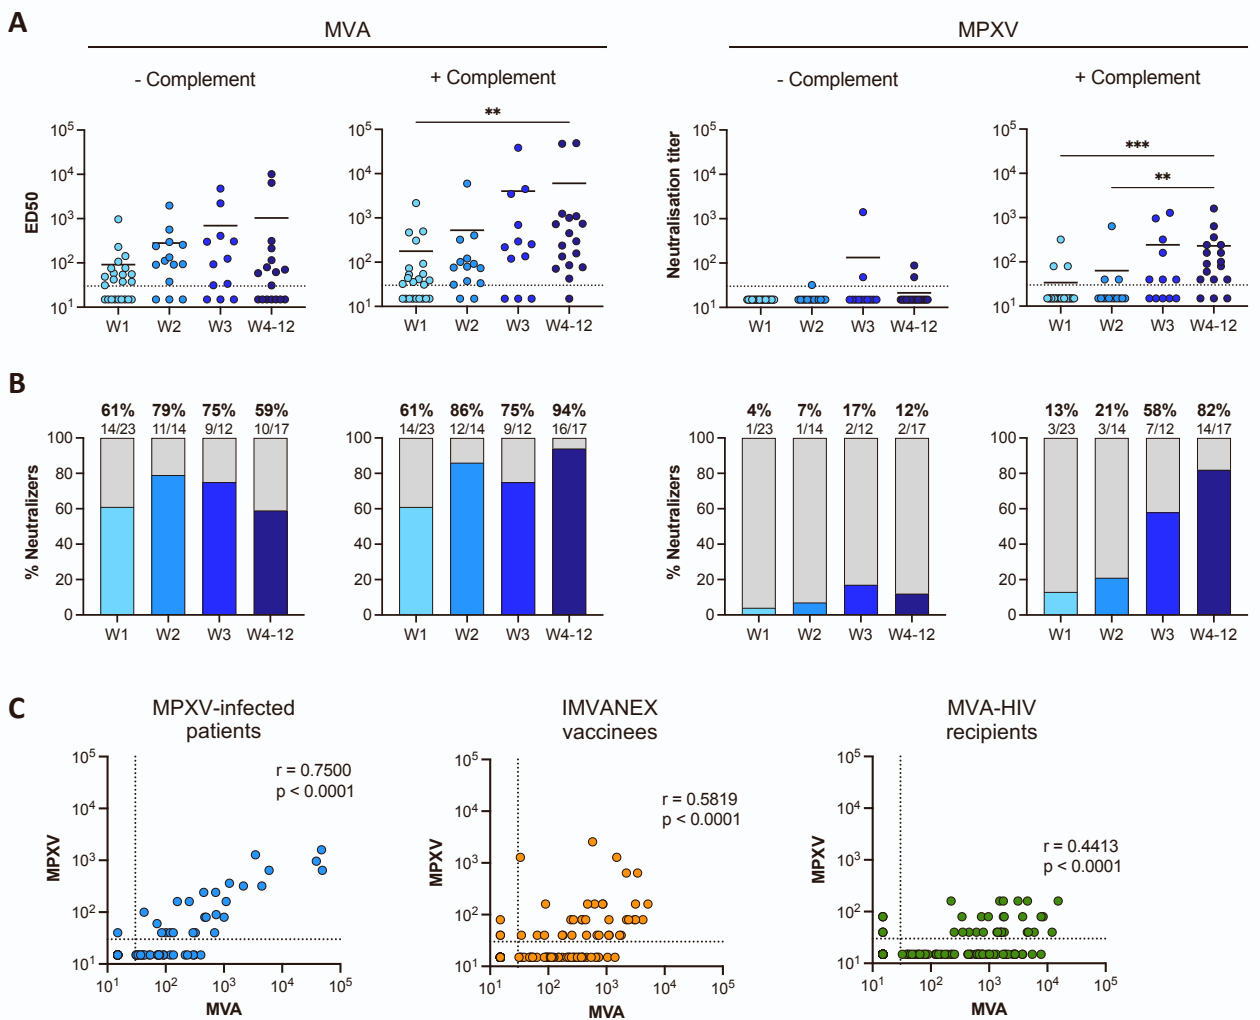

**Extended Data Fig. 2. Evolution and correlation of anti-MVA and anti-MPXV Nabs, related to Figure 4, Figure 5 and Figure 6**

- (A) Seroneutralization of MVA-GFP (left) and MPXV (right) by sera from MPXV-infected patients in the absence and presence of 10% guinea pig serum as a source of complement. Sera from individuals born before and after 1980 were analyzed. The weeks (W) of sample collection are shown. See also Fig. 4. The dotted lines represent the limit of detection (LOD). Each dot represents an individual and data are mean of two to six independent experiments. Bars indicate mean values. Statistical analysis: Kruskal-Wallis tests with Dunn's multiple comparisons correction (\*  $p < 0.03$ ; \*\*  $p < 0.002$ ; \*\*\*  $p < 0.0002$ ; \*\*\*\*  $p < 0.0001$ ).
- (B) The proportion of neutralizers was estimated as the percentage of individuals exhibiting a neutralizing activity  $>$  LOD.
- (C) Correlative analysis of the neutralizing activity (with complement) of sera from MPXV-infected patients, IMVANEX vaccinees and MVA-HIV recipients against MVA and MPXV. See also Fig. 4, Fig. 5, and Fig. 6. Each dot represents an individual and data are mean of two to six independent experiments. Statistical analysis was assessed using non-parametric Spearman correlations.

|                |         |            |
|----------------|---------|------------|
| Nb of patients |         | 88         |
| Sex            |         |            |
|                | Female  | 53 (60%)   |
|                | Male    | 32 (37%)   |
|                | Unknown | 3 (3%)     |
| Age            |         | 51 [22-69] |
| Birth year     |         |            |
|                | > 1980  | 34 (39%)   |
|                | < 1980  | 54 (61%)   |

**Table S1. Characteristics of uninfected donors, related to Figure 3**

|                                     | Pitié-Salpêtrière hospital (n=39) |            | Henri Mondor hospital (n=9) |            |
|-------------------------------------|-----------------------------------|------------|-----------------------------|------------|
|                                     | > 1980                            | < 1980     | > 1980                      | < 1980     |
| <b>Nb of patients</b>               | 32 (82%)                          | 7 (18%)    | 7 (78%)                     | 2 (22%)    |
| <b>Sex</b>                          |                                   |            |                             |            |
| Female                              | 0 (0%)                            | 0 (0%)     | 0 (0%)                      | 0 (0%)     |
| Male                                | 32 (100%)                         | 7 (100%)   | 7 (100%)                    | 2 (100%)   |
| <b>Age</b>                          | 31 [21-41]                        | 51 [43-62] | 32 [24-40]                  | 57 [49-64] |
| <b>Days after onset of symptoms</b> | 10 [3-80]                         | 6 [2-56]   | 27 [21-33]                  | 22 [18-26] |
| <b>Nb of samples</b>                | 46                                | 11         | 7                           | 2          |
| Week 1 (W1)                         | 17 (37%)                          | 6 (55%)    | 0 (0%)                      | 0 (0%)     |
| Week 2 (W2)                         | 13 (28%)                          | 1 (9%)     | 0 (0%)                      | 0 (0%)     |
| Week 3 (W3)                         | 9 (20%)                           | 2 (18%)    | 0 (0%)                      | 1 (50%)    |
| Week 4 to 12 (W4-12)                | 7 (15%)                           | 2 (18%)    | 7 (100%)                    | 1 (50%)    |

**Table S2. Characteristics of MPXV-infected patients, related to Figure 4**

|                                 | Orléans hospital (n=42) |            | Henri Mondor hospital (n=43) |            |
|---------------------------------|-------------------------|------------|------------------------------|------------|
|                                 | > 1980                  | < 1980     | > 1980                       | < 1980     |
| <b>Nb of patients</b>           | 17 (40%)                | 25 (60%)   | 15 (35%)                     | 28 (65%)   |
| <b>Sex</b>                      |                         |            |                              |            |
| Female                          | 0 (0%)                  | 0 (0%)     | 0% (0%)                      | 0% (0%)    |
| Male                            | 17 (100%)               | 25 (100%)  | 15 (100%)                    | 28 (100%)  |
| <b>Age</b>                      | 38 [21-41]              | 55 [43-71] | 35 [22-41]                   | 54 [44-71] |
| <b>Status</b>                   |                         |            |                              |            |
| HIV positivity                  | 5 (29%)                 | 15 (60%)   | 4 (27%)                      | 10 (36%)   |
| HIV PrEP                        | 10 (59%)                | 10 (40%)   | 7 (47%)                      | 9 (32%)    |
| <b>IMVANEX vaccine</b>          |                         |            |                              |            |
| No dose                         | 16 (94%)                | 25 (100%)  | 0 (0%)                       | 0 (0%)     |
| 1 dose                          | 17 (100%)               | 24 (96%)   | 12 (80%)                     | 28 (100%)  |
| 2 doses                         | 13 (76%)                | 3 (12%)    | 8 (53%)                      | 1 (3%)     |
| <b>Delay between doses</b>      | 30 [28-42]              | 34 [28-71] | 28 [28-28]                   | 28 [28-28] |
| <b>Time of serum collection</b> |                         |            |                              |            |
| After the 1 <sup>st</sup> dose  | 30 [28-42]              | 34 [28-71] | 28 [28-28]                   | 15 [15-28] |
| After the 2 <sup>nd</sup> dose  | 35 [10-56]              | 23 [22-40] | 15 [15-15]                   | 15 [15-15] |

**Table S3. Characteristics of IMVANEX vaccinees, related to Figure 5**

|                                 | VRI (n=66) |           |
|---------------------------------|------------|-----------|
|                                 | > 1980     | < 1980    |
| Nb of participants              | 50 (76%)   | 16 (24%)  |
| Sex                             | Unknown    |           |
| Age                             | Unknown    |           |
| <b>MVA-HIV vaccine</b>          |            |           |
| No dose                         | 50 (100%)  | 16 (100%) |
| 1 dose                          | 30 (60%)   | 12 (75%)  |
| 2 doses                         | 44 (88%)   | 17 (100%) |
| Delay between doses             | 8 weeks    | 8 weeks   |
| <b>Time of serum collection</b> |            |           |
| After the 1 <sup>st</sup> dose  | 2 weeks    | 2 weeks   |
| After the 2 <sup>nd</sup> dose  | 2 weeks    | 2 weeks   |

**Table S4. Characteristics of MVA-HIV recipients, related to Figure 6**
